# Supplementary material
Source: ML conference proceedings conference paper supplement (https://openreview.net/forum?id=euOVJEhflG)
Supplement: supplementary_material [file attachment]

# ONLINE ROUNDING AND LEARNING AUGMENTED ALGORITHMS FOR FACILITY LOCATION

**Silvio Lattanzi**

Google Research  
Barcelona, Spain  
silviol@google.com

**Debmalya Panigrahi** \*

Duke University  
Durham, United States  
debmalya@cs.duke.edu

**Ola Svensson** †

EPFL  
Lausanne, Switzerland  
ola.svensson@epfl.ch

## ABSTRACT

Facility Location is a fundamental problem in clustering and unsupervised learning. Recently, significant attention has been given to studying this problem in the classical online setting enhanced with machine learning advice. While (almost) tight bounds exist for the fractional version of the problem, the integral version remains less understood, with only weaker results available. In this paper, we address this gap by presenting the first online rounding algorithms for the facility location problem, and by showing their applications to online facility location with machine learning advice. Beyond its implications for the learning augmented setting, our results also show that the hardness of the classic online facility location problem lies in computing a good fractional solution and not in rounding it.

## 1 INTRODUCTION

Clustering is a central problem in unsupervised learning. In recent years, to capture the evolving nature of real world data, there has been increased interest in clustering problems in the online setting, where the set of points that have to be clustered is not known in advance and is revealed to the algorithm over time Meyerson (2001); Alon et al. (2006); Fotakis (2011); Lattanzi and Vassilvitskii (2017); Almanza et al. (2021); Cohen-Addad et al. (2021); Fotakis et al. (2021b); Lattanzi et al. (2021); Anand et al. (2022); Cohen-Addad et al. (2022). This increased interest reflects the growing importance of performing learning tasks in uncertain and dynamically changing environments. To mitigate the negative impact of the uncertainty on algorithmic performance, a new paradigm using machine-learned predictions has rapidly gained traction in the last few years Purohit et al. (2018); Antoniadis et al. (2020); Bamas et al. (2020); Lattanzi et al. (2020); Wei and Zhang (2020); Im et al. (2021); Lykouris and Vassilvitskii (2021); Chen et al. (2022); Mitzenmacher and Vassilvitskii (2022); Bai and Coester (2023). The basic tenet of this framework is to simultaneously ensure that the algorithm is able to exploit *good* predictions about the future (called *consistency*) while being minimally affected by *bad* ones (called *robustness*), although it is unable to distinguish the good from the bad predictions presented to it. In this paper, we present new algorithms for the classical facility location problem in the online setting augmented with machine-learned predictions. These results are derived via novel online rounding algorithms of fractional solutions, which may be of independent interest.

In clustering problems, the goal is to partition (or cluster) a set of data points (called clients) into designated groups (or clusters) while optimizing a desired objective. One of the most popular is the  $k$ -median problem, which asks to select  $k$  cluster centers such that the sum of distances of the clients from their nearest cluster centers is minimized. The condition that only  $k$  centers can be chosen can be rather constraining, particularly in the online setting where it renders the problem uninteresting because the algorithm fails to remain competitive after it has opened all  $k$  centers.

A natural and well-studied (Lagrangian) relaxation of  $k$ -median is the facility location problem, where an arbitrary number of centers (called facilities) can be opened but each open facility adds an

\*Supported in part by NSF grants CCF-2329230 and CCF-1955703.

†Supported by the Swiss State Secretariat for Education, Research and Innovation (SERI) under contract number MB22.00054.

opening cost to the objective. The online facility location problem where clients arrive over time was introduced by Meyerson Meyerson (2001), and has since been studied extensively Anagnostopoulos et al. (2004); Fotakis (2007; 2008; 2011). The advantage of this setting is that it produces stable clusters that can be used in downstream tasks, notably as input to machine learning models, whereas changes to the clustering would incur substantial overhead. In recent years, interest has grown in obtaining learning-augmented algorithms for this problem, where machine-learned suggestions about the clustering solution are incorporated into the decision-making of the algorithm Almanza et al. (2021); Jiang et al. (2022); Fotakis et al. (2021a); Anand et al. (2022). This has led to almost tight bounds for *fractional* versions of this problem, while the integral version remains less understood, especially in the presence of multiple advice. In this paper, we address this gap by presenting the first online rounding algorithm for facility location, and show its applications to learning-augmented versions of the problem.

**Our Contributions.** We present two new online rounding algorithms for the facility location problem. Both algorithms take as input a fractional solution and produce an integral solution in the online setting. To the best of our knowledge, these are the first two online rounding algorithms for the metric facility location problem. This work introduces novel techniques that heavily exploit the problem’s underlying metric structure, contributing to the growing literature on online rounding algorithms. We believe these techniques are also of interest for a broader range of clustering problems.

Our first algorithm is for the uniform version, where all facilities have the same opening cost. In this case, we give a deterministic online rounding algorithm that produces an integral solution whose cost is only a constant times that of the fractional solution input to it. Paired with prior results for the fractional problem, we obtain new algorithms for the *integral* facility location problem with machine learning advice that matches the almost tight results, which were previously only known for the fractional version.

Our second algorithm is for the non-uniform problem with arbitrary facility opening costs. For this more general problem, we give an online rounding algorithm that is randomized and loses a factor of  $O(\log \log \Delta)$  in expectation compared to its fractional input, where  $\Delta$  is the aspect ratio of the underlying metric space. We remark that, by standard techniques (see Appendix E), the upper bound  $O(\log \log \Delta)$  may be replaced by  $O(\log \log n)$ , where  $n$  is the number of clients in the instance. As in the uniform case, this algorithm can be paired with existing algorithms for the corresponding fractional problem and yields a nearly optimal competitive algorithm for the online problem.

As an application of our rounding algorithms, we obtain the *first* integral algorithm for online facility location in the multiple predictions setting Almanza et al. (2021); Anand et al. (2022). The consistency bounds that we obtain are tight up to lower-order terms, thereby bridging fractional and integral results for this problem. Simultaneously, we also obtain tight robustness bounds for the learning-augmented setting by using a combiner algorithm that obtains the better of the solutions between our algorithm and online facility location without predictions.

All our rounding algorithms run in polynomial time in the number of revealed clients; a detailed running time analysis is provided in Appendix F.

**Other Related Work.** The two most related works are Almanza et al. (2021); Anand et al. (2022). The first paper studied the learning-augmented facility location problem in the uniform case. Their integral algorithm has a cost overhead of  $O(\log \log n)$  compared to the best fractional solution, and works in the simplified setting where all the predictions are presented before any client arrives. In comparison, we improve the cost overhead to  $O(1)$  and no longer require the predictions to be given upfront. The second paper studied online covering problems with multiple machine learning advice. They provide several interesting results in this setting and in particular an online fractional algorithm to the learning-augmented facility location problem. Our work bridges this fractional result and the integral facility location problem. We also note that there is prior work on online facility location with a *single* machine learning advice Azar et al. (2022); Fotakis et al. (2025), or from a mechanism design perspective Balkanski et al. (2024). The results in these papers do not have any implication for the multiple predictions settings of the current paper, and are obtained using very different techniques.

More broadly, there has been significant recent interest in online rounding algorithms, especially for matching problems Buchbinder et al. (2023); Naor et al. (2025). In addition to its application to learning-augmented algorithms, our work adds to this portfolio of online rounding algorithms, specifically extending it beyond packing to covering problems. Our techniques differ from previous

work in that they use structural properties of the underlying metric space to define rounding solutions, both using deterministic and randomized tools. Indeed, this is in sharp contrast to prior work on online rounding for facility location in *non-metric* settings Alon et al. (2006); Bienkowski et al. (2020). In these papers, the rounding algorithms *must* incur a logarithmic loss (being basically identical to the set cover problem) while we incur sub-logarithmic loss by exploiting metric properties.

**Organization.** We formally define our problem and state our results in Section 2. In Section 3, we present the deterministic rounding algorithm for the uniform setting. In Section 4, we present the randomized rounding algorithm for the (general) non-uniform case. In Section 5, we give applications of these rounding algorithms to obtain new results for the learning-augmented facility location problem. In Appendix D, we present a lower bound showing that our analysis of the randomized rounding algorithm for the non-uniform setting is (asymptotically) tight. Finally, in Appendix F, we provide a running time analysis of our rounding methods.

## 2 PRELIMINARIES

**Online Facility Location.** The classic online facility location problem is defined on a metric space  $(V, d)$ , where  $V$  is a set of vertices and  $d$  is the distance function between vertex pairs satisfying the standard properties of a metric space: (i) (Non-negativity)  $d(u, v) \geq 0$  for all  $u, v \in V$  with  $d(v, v) = 0$  for all  $v \in V$ , (ii) (Symmetry)  $d(u, v) = d(v, u)$  for all  $u, v \in V$ , and (iii) (Triangle Inequality)  $d(u, v) + d(v, w) \geq d(u, w)$  for all  $u, v, w \in V$ .

The metric space  $(V, d)$  is revealed online to the algorithm: in each online step  $t$ , a new vertex  $v_t \in V$  is revealed along with (i) its distance to all vertices revealed in previous steps, and (ii) its (non-negative) facility opening cost  $c(v_t)$ . If the opening cost is uniform across all vertices, then it is a *uniform* instance, otherwise it is a *non-uniform* instance. By scaling, all opening costs are 1 in the uniform case.

We denote the set of vertices revealed in the first  $t$  steps  $V_t$ . In step  $t$ , the online algorithm’s solution comprises a subset of vertices in  $V_t$  where facilities are opened by the algorithm; we denote this set  $F_t$ . The sets  $F_t$  must be monotone over time, i.e., an open facility cannot be closed:  $F_1 \subseteq F_2 \subseteq \dots \subseteq F_t$ . The *connection cost* of a vertex  $v \in V_t$  is its distance to the closest open facility. Collectively, the cost of the solution is the sum of the opening costs of the facilities and the connection costs of all vertices, i.e.,  $\text{alg}_t = \sum_{v \in F_t} c(v) + \sum_{u \in V_t} \min_{v \in F_t} d(u, v)$ .

Let  $\text{opt}_t$  denote the cost of an optimal solution on the instance  $(V_t, d)$ . Then, the competitive ratio of the online algorithm is defined as:  $\max_t \text{alg}_t / \text{opt}_t$ . Moreover, if the algorithm is randomized, the competitive ratio is  $\max_t \mathbb{E}[\text{alg}_t] / \text{opt}_t$ , where the expectation is over the random choices of the algorithm.

**Fractional solution and ML-advice.** To define a valid fractional solution, it would be convenient to first write a (standard) LP relaxation of the problem. The following is the LP at step  $t$ :

$$\text{minimize } \sum_{v \in V_t} c(v) y_v^t + \sum_{u \in V_t} \sum_{v \in V_t} d(u, v) x_{uv}^t \text{ such that}$$

$$\sum_{v \in V_t} x_{uv}^t = 1 \quad \forall u \in V_t \quad (1)$$

$$x_{uv}^t \leq y_v^t \quad \forall v \in V_t \quad (2)$$

$$x_{uv}^t, y_v^t \geq 0 \quad \forall u, v \in V_t \quad (3)$$

The online fractional solution in step  $t$  is a feasible solution to this LP. Moreover, the variables  $y_v^t$  that represent the fraction of the facility at vertex  $v$  that is open at time  $t$  are non-decreasing over time:  $y_v^1 \leq y_v^2 \leq \dots$  for all  $v$ . We will refer to the value of  $y_v^t$  as the *fractional mass* at vertex  $v$  at time  $t$ .

Note that the values of  $y_v^t$  completely specify the fractional solution even without explicitly defining  $x_{uv}^t$ . This is because the optimal values of the  $x_{uv}^t$  variables is given as follows: for each client  $u \in V_t$ , order the vertices in  $V_t$  in non-decreasing distance from  $u$  (breaking ties arbitrarily), and select the minimal prefix of this order such that the total fractional mass in this prefix is at least 1. Now, assign  $x_{uv}^t = y_v^t$  for all facilities  $v$  in this prefix, except possibly for the last one. For this last

vertex, the value of  $x_{uv}^t$  is such that sum of  $x_{uv}^t$  over all the facilities in the prefix is 1. The value of  $x_{uv}^t$  for all vertices outside this prefix is 0.

In the learning-augmented facility location problem, whenever a new vertex  $v$  arrives, one also receives  $k$  feasible suggestions (predictions)  $y_v(1), \dots, y_v(k)$  for the value of  $y_v$ . We consider the  $k$  suggestions at each step as a collection (or bag) of predictions, disregarding any association with specific predictors. Our objective is to achieve performance comparable to the best suggestion in each step, i.e., we seek the minimum-cost solution that is consistent with at least one suggestion at every stage. Formally,

$$\text{dynamic}_t = \min_{\hat{y} \in \hat{Y}} \sum_{v \in V_t} c(v) \hat{y}_v + \sum_{u \in V_t} \sum_{v \in V_t} d(u, v) x_{uv}^t,$$

where  $\hat{Y} = \{\hat{y} : \forall v \in V_t, \exists i \in [k], \hat{y}_v = y_v(i)\}$  and  $x_{uv}^t$  are defined using the values of  $\hat{y}$  as described above.

It is interesting to note that this model of predictions generalizes other natural types of predictions. E.g., if the predictions specify opening a facility at a vertex when it arrives or even at the very outset Almanza et al. (2021), it can be simulated by setting  $y_v = 1$  in our prediction model. In fact, our prediction model captures the very natural setting where the variable  $y_v$  represents the probability that a facility is opened at vertex  $v$ .

We also note that our algorithm consider the possibility to open previously specified facilities as long as the assignment is online. This is standard in the literature. In fact, in the traditional online model for the facility location problem, introduced by Meyerson (2001), for non-uniform facility location (this is specified in the first paragraph of Section 3 in Meyerson (2001)) the facility locations are known before the clients arrive online, the demands are specified online and the assignments and the opening are decided online (in particular any facility location can be opened at any time and this is necessary in this setting). Furthermore, in Almanza et al. (2021), in the non-uniform case, the set of suggested facilities is specified in advance and facilities can be opened in these specified locations.

In the learning-augmented facility location problem, we aim to return an integral solution (i.e. a solution where all the  $y$  variables have integral value) such that its cost is bounded by  $\min\{\alpha \text{dynamic}_t, \beta \text{opt}_t\}$  for  $\alpha$  and  $\beta$  as small as possible. From lower-bounds in previous works Almanza et al. (2021); Anand et al. (2022), we know that  $\alpha \geq \frac{\log k}{\log \log k}$  and that  $\beta \geq \frac{\log t}{\log \log t}$  Fotakis (2008).

With the above notation, we can state the implication of our rounding algorithms more formally for the learning-augmented problems. First, we study the uniform setting where all the facilities have the same opening cost. In this setting, our rounding algorithm implies a deterministic algorithm that obtains a  $O(\min\{\log(k+1) \text{dynamic}_t, \frac{\log t}{\log \log t} \text{opt}_t\})$ -approximation, improving previous work in the area. Second, we use our non-uniform facility rounding algorithm to obtain the *first* learning-augmented algorithm for the non-uniform facility location problem. Our algorithm returns a  $O(\log \log \Delta \cdot \min\{\log(k+1) \text{dynamic}_t, \frac{\log t}{\log \log t} \text{opt}_t\})$ -approximation (recall that, by standard techniques (see Appendix E), the upper bound  $O(\log \log \Delta)$  may be replaced by  $O(\log \log n)$ ). Both results start from the fractional solution built for the learning-augmented facility location problem designed in previous work Anand et al. (2022) and use our online rounding algorithms to obtain the final integral results.

**Additional notation.** Consider the metric space  $(V_t, d)$  at time  $t$ . The ball centered at some vertex  $v \in V_t$  with radius  $R \geq 0$  in this metric space is denoted  $B^t(v, R)$ :  $B^t(v, R) = \{u \in V_t : d(u, v) \leq R\}$ . For any set of vertices  $S \subseteq V_t$ , the total fractional mass on the vertices of  $S$  at time  $t$  is denoted  $y^t(S)$ :  $y^t(S) = \sum_{v \in S} y_v^t$ . Clearly,  $y^t(S)$  is also non-decreasing over time. In particular, we will often consider the total fractional mass at time  $t$  in a ball  $B = B^t(v, r)$ ; this is denoted  $y^t(B)$ .

**$\gamma$ -Consistent Rounding.** Consider a fractional solution  $\mathbf{y}^t = (y_v^t, v \in V_t)$  (recall from above that  $\mathbf{y}^t$  is sufficient to define a solution). Now, suppose we round this fractional solution to produce an integer solution  $F_t \subseteq V_t$ . We say that  $F_t$  is  $\gamma$ -consistent with  $\mathbf{y}^t$  if the following property holds:

( $\gamma$ -Consistency.) For any ball  $B = B^t(v, R)$  centered at a vertex  $v \in V_t$  and with radius  $R$ , if  $y^t(B) \geq 1/2$ , then there is an open facility in  $F_t$  that is within distance  $\gamma R$  of  $v$ .

We show that the  $\gamma$ -consistency property implies that the connection costs of the fractional and integral solutions are related.

**Lemma 1.** *If an integral solution  $F_t$  is  $\gamma$ -consistent with a fractional solution  $\mathbf{y}^t$ , then the total connection cost of all the clients in  $V_t$  in the integer solution is at most  $2\gamma$  times that in the fractional solution. In notation,*

$$\sum_{u \in V_t} \min_{v \in F_t} d(u, v) \leq 2\gamma \cdot \sum_{u \in V_t} \sum_{v \in V_t} d(u, v) x_{uv}^t,$$

for any  $\mathbf{x}^t$  such that  $(\mathbf{y}^t, \mathbf{x}^t)$  is feasible for the LP given above.

*Proof.* Consider a client at vertex  $u$  that arrives at time  $t$ . Suppose its fractional connection cost is  $\beta$ , i.e.,  $\sum_{v \in V} d(u, v) x_{uv}^t = \beta$  where  $\sum_{v \in V} x_{uv}^t = 1$  and  $x_{uv}^t \leq y_v^t$  for all  $v \in V_t$ . Then,  $\sum_{v \in B(u, 2\beta)} y_v^t \geq \sum_{v \in B(u, 2\beta)} x_{uv}^t \geq 1/2$ . Note that  $\gamma$ -consistency ensures that there is at least one facility at distance  $2\gamma\beta$  from  $u$  after the processing at time  $t$ . It follows that the connection cost of client  $u$  in the integer solution is at most  $2\gamma\beta$ .  $\square$

Our goal is to obtain  $\gamma$ -competitive solutions so that the total connection cost can be bounded immediately by Lemma 1. So, our analysis will comprise two parts: first, obtain an explicit bound on the facility opening cost  $\sum_{v \in F_t} c(v)$  of the integral solution against the opening cost of the fractional solution,  $\sum_{v \in V_t} c(v) y_v$ ; and second, establish  $\gamma$ -competitiveness of the integral solution with respect to the fractional solution for a suitable value of  $\gamma$ .

### 3 DETERMINISTIC ROUNDING ALGORITHM FOR UNIFORM OPENING COSTS

In this section we present our deterministic online rounding algorithm for the uniform facility case. This algorithm combined with the fractional algorithm in Anand et al. (2022) will imply our result for learning-augmented facility location as we will show in Section 5.

We start by stating the main result of this section.

**Theorem 2.** *There exists an online algorithm that rounds a fractional solution of uniform facility location online and the cost of the returned integral solution is  $O(\alpha)$ , where  $\alpha$  denotes the cost of the fractional solution.*

**The Algorithm.** The main idea behind the algorithm is to guarantee that at any point in time the algorithm is 4-consistent. In order to do so if at time  $t$  a ball  $B^t(v, R)$  has total fractional mass  $y^t(B) \geq 1/2$  and has the closest open facility at a distance  $\geq 4R$  we open a facility at  $v$ . While this guarantees 4-consistency, it can lead to excessive facility openings. To mitigate this, additional facilities are opened. Roughly, if there is a ball  $B^t(u, r)$  with total fractional mass in the ball  $y^t(B) \geq 1/4$  that intersects  $B^t(v, R)$  and such that the closest open facility to  $u$  is at a distance  $\geq 3r$  we open also a facility at  $u$ . In addition, we do this an additional time by considering balls  $B^t(w, \rho)$  with total fractional mass in the ball  $y^t(B) \geq 1/8$ , intersecting with  $B^t(u, r)$  and with closest open facility to  $w$  is at a distance  $> 2\rho$  and by opening a facility in such  $w$ . Interestingly, by opening these additional facilities we can show that the number of open facility is bounded and by combining this with the fact that the algorithm is 4-consistent we obtain the theorem.

Roughly speaking the algorithm uses a three levels covering scheme. Level-1 (Condition A balls): The algorithm identifies a large primary region,  $B(v, R)$ , containing significant fractional mass ( $\geq 1/2$ ) that lacks nearby facilities (distance  $> 4R$ ). It commits to opening a facility here. Level-2 (Condition B balls): To ensure dense, off-center subsets of this demand are adequately served, the algorithm searches for smaller overlapping balls,  $B(u, r)$ , with a mass of  $\geq 1/4$  that are also poorly served (distance  $> 3r$ ). Level-3 (Condition C balls): Finally, it recursively checks for even smaller, isolated pockets of mass ( $\geq 1/8$ ) overlapping the Level-2 ball. Crucially, to prevent over-opening, these Level-3 balls are proven to be mutually disjoint, meaning a Level-2 ball will spawn at most 3 Level-3 facilities.

To define the algorithm, we start to formalize the three conditions discussed above:

- A ball  $B = B^t(v, R)$  is said to satisfy **Condition A** at time  $t$  if the following holds:
  - the total fractional mass in the ball  $y^t(B) \geq 1/2$
  - the closest open facility to  $v$  is at a distance  $> 4R$ .

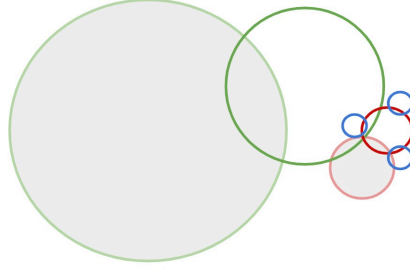

Figure 1: Green balls are at level-1, red balls are at level-2, blue balls are at level-3. Level-3 balls associated with the same level-2 balls are disjoint and are at most 3. Level-2 and level-1 balls can overlap but any new ball is associated with some new additional fractional mass. This allows us to bound the number of level-2 and level-1 balls.

- A ball  $B = B^t(u, r)$  is said to satisfy **Condition B** at time  $t$  if the following holds:
  - the total fractional mass in the ball  $y^t(B) \geq 1/4$
  - the closest open facility to  $u$  is at a distance  $> 3r$ .
- A ball  $B = B^t(w, \rho)$  is said to satisfy **Condition C** at time  $t$  if the following holds:
  - the total fractional mass in the ball  $y^t(B) \geq 1/8$
  - the closest open facility to  $w$  is at a distance  $> 2\rho$ .

We use the above conditions to define the online algorithm. In the description below, we define the algorithmic steps at some time  $t$ . For the purpose of analysis, it would be convenient to think of time as continuous, although the actual implementation of the algorithm can be easily discretized by skipping over times where the online algorithm does not make any updates.

When a client arrives, the algorithm first updates the fractional solution, then rounds it based on Algorithm 1, and finally connects the client to the closest open facility.

---

**Algorithm 1:** The Deterministic Online Rounding Algorithm for Uniform Facility Location

---

```

while  $\exists$  a ball  $B(v, R)$  satisfying condition A do
  Let  $B(v, R)$  be a ball of minimum radius satisfying the condition A.
  while  $\exists$  a ball  $B(u, r)$  for some  $r \leq R/3$  satisfying condition B s.t.  $B(u, r) \cap B(v, R) \neq \emptyset$ 
  do
    Let  $B(u, r)$  be a ball of minimum radius satisfying the condition B and intersecting
     $B(v, R)$ ;
    while  $\exists$  a ball  $B(w, \rho)$  for some  $\rho \leq r/2$  satisfying condition C s.t.
     $B(w, \rho) \cap B(u, r) \neq \emptyset$  do
      Let  $B(w, \rho)$  be a ball of minimum radius satisfying the condition C and intersecting
       $B(u, r)$ ;
      Open a facility at  $w$ ;
    Open a facility at  $u$ ;
  Open a facility at  $v$ ;

```

---

**Analysis.** First, we bound the facility cost, namely we show that the number of facilities opened by the algorithm is at most a constant times the final value of the fractional solution  $\sum_v y_v$ .

We call the ball selected in the outer loop level-1 ball and the respective facility level-1 facility, the one selected in the second loop level-2 ball and level-2 facility and the one selected in the innermost loop level-3. In Figure 1, we show graphically the interaction between ball at different levels. Note that a ball at level-1 only open a single in the outer loop, a ball at level-2 open a single facility at level-2 but possibly multiple facilities at level-3. So in our proof we first bound the number of facilities opened in level-3. Then we show how to bound the number of level-1 and level-2 facilities. To do this, we first need to establish disjointness of the level-3 balls associated with a level-2 ball.

**Lemma 3.** *The level-3 balls associated with a level-2 ball  $B(u, r)$  are mutually disjoint.*

*Proof.* Suppose not; let  $B(w, \rho)$  and  $B(w', \rho')$  overlap. Without loss of generality, suppose  $\rho \leq \rho'$ . Then, the algorithm processes  $B(w, \rho)$  before  $B(w', \rho')$ . At the end of the processing for  $B(w, \rho)$ , the algorithm opens a level-3 facility at  $w$ . Since  $B(w, \rho)$  and  $B(w', \rho')$  overlap, we have  $d(w, w') \leq \rho + \rho'$ . Therefore, there is an open facility at distance  $\leq \rho + \rho'$  from  $w'$ . Yet,  $B(w', \rho')$  satisfies condition C; this implies  $\rho + \rho' > 2\rho'$ , i.e.,  $\rho > \rho'$ . This is a contradiction.  $\square$

**Lemma 4.** *The total number of level-3 facilities opened by a (level-2) ball  $B(u, r)$  is at most 3.*

*Proof.* Suppose  $B(u, r)$  opens  $\geq 4$  level-3 facilities. Since the level-3 balls corresponding to these facilities are mutually disjoint (by Lemma 3), it follows that the total fractional mass in these level-3 balls is at least  $4 \cdot 1/8 = 1/2$ . Now, note that the ball  $B(u, 2r)$  contains all these level-3 balls; hence, this ball also has fractional mass at least  $1/2$ . The radius of this ball is  $2r \leq 2R/3 < R$ . Since this ball has a smaller radius than  $B(v, R)$  but  $B(v, R)$  was chosen as a minimum radius ball satisfying condition A, it must be the case that  $B(u, 2r)$  does not satisfy condition A. Since  $y^t(B(u, 2r)) \geq 1/2$ , the only way it can fail to satisfy condition A is if there is an open facility at distance  $\leq 8r$  from  $u$ . But, since the balls  $B(v, R)$  and  $B(u, r)$  overlap,  $d(v, u) \leq R + r$ . Thus,  $v$  has an open facility at distance at most  $8r + (R + r) \leq 8R/3 + (R + R/3) \leq 4R$ . This contradicts the fact that the ball  $B(v, R)$  satisfies condition A.  $\square$

Next, we bound the number of level-1 and level-2 facilities. The arguments for these two cases are quite similar. We start by defining predecessors for level-1 and level-2 facilities. Consider a level-1 facility at vertex  $v$  opened by a level-1 ball  $B(v, R)$  at time  $t$ . We call a level-1 facility at some vertex  $v'$  the *predecessor* of the level-1 facility at  $v$  if the following holds:

- The level-1 facility at  $v'$  was opened before the level-1 facility at  $v$ .
- The level-1 ball  $B(v', R')$  that opened the level-1 facility at  $v'$  overlaps with the level-1 ball  $B(v, R)$ .
- The level-1 balls corresponding to the level-1 facilities opened after  $v'$  and before  $v$  do not overlap with the level-1 ball  $B(v, R)$ .

**Lemma 5.** *Consider a level-1 facility opened by a ball  $B(v, R)$  at time  $t$ . Let the predecessor of this level-1 facility at  $v$  be a level-1 facility at  $v'$  that was opened by the level-1 ball  $B(v', R')$  at time  $t' \leq t$ . Then,*

$$y^t(B(v, R)) - y^{t'}(B(v, R)) \geq 1/4.$$

*Proof.* Since the balls  $B(v, R)$  and  $B(v', R')$  overlap, we have  $d(v, v') \leq R + R'$ . But, note that the ball  $B(v, R)$  satisfied condition A at time  $t$ , i.e., there was no open facility within a distance of  $4R$  of  $v$  at time  $t$ . In particular, this implies that the facility at  $v'$  is also at a distance  $> 4R$  from  $v$ , namely  $d(v, v') > 4R$ . It follows that  $R + R' > 4R$ , i.e.,  $R' > 3R$ .

Suppose the lemma is false, i.e.,  $y^t(B(v, R)) - y^{t'}(B(v, R)) < 1/4$ . Since  $y^t(B(v, R)) \geq 1/2$ , it follows that  $y^{t'}(B(v, R)) > 1/4$ . Since the processing of  $B(v', R')$  did not open a facility at  $v$ , it must be that  $B(v, R)$  failed condition B at the end of this processing. Since  $y^{t'}(B(v, R)) > 1/4$ , the only way this can happen is if there was a facility open at distance  $\leq 3R$  from  $v$  at the end of the processing for  $B(v', R')$ . But, this contradicts the fact that  $B(v, R)$  satisfied condition A at time  $t$ .  $\square$

The definition of the predecessor of a level-2 facility is similar to that for level-1 facilities. Consider a level-2 facility at vertex  $u$  opened by a level-2 ball  $B(u, r)$  at time  $t$ . We call a level-2 facility at some vertex  $u'$  the *predecessor* of the level-2 facility at  $u$  if the following holds:

- The level-2 facility at  $u'$  was opened before the level-2 facility at  $u$ .
- The level-2 ball  $B(u', r')$  that opened the level-2 facility at  $u'$  overlaps with the level-2 ball  $B(u, r)$ .
- The level-2 balls corresponding to the level-2 facilities opened after  $u'$  and before  $u$  do not overlap with the level-2 ball  $B(u, r)$ .

Now, using the same proof strategy of Lemma 5, one can show that the overlap between level-2 ball is bounded. Here we present the statement of the Lemma and defer the proof to Appendix A

**Lemma 6.** *Consider a level-2 facility opened by a ball  $B(u, r)$  at time  $t$ . Let the predecessor of this level-2 facility at  $u$  be a level-2 facility at  $u'$  that was opened by the level-2 ball  $B(u', r')$  at time  $t' \leq t$ . Then,*

$$y^t(B(u, r)) - y^{t'}(B(u, r)) \geq 1/8.$$

We are now ready to bound the facility cost:

**Theorem 7.** *The number of facilities opened by the rounding algorithm is at most  $36 \cdot \sum_v y_v$ , where  $y_v$  is the final value of the fractional solution for vertex  $v$ .*

*Proof.* We charge a level-1 facility opened by a level-1 ball  $B(v, R)$  to the gain in fractional mass  $y(B(v, R))$  after time  $t'$  until time  $t$ , where  $t'$  denotes the time when the predecessor of the facility at  $v$  was opened. This charging only loses a factor of 4 by Lemma 5.

We charge the level-2 facility and the level-3 facilities opened by a level-2 ball  $B(u, r)$  to the gain in fractional mass  $y(B(u, r))$  after time  $t'$  until time  $t$ , where  $t'$  denotes the time when the predecessor of the facility at  $u$  was opened. The charging of the level-2 facility only loses a factor of 8 by Lemma 6 and that of the level-3 facilities loses a factor of 24 by Lemma 4.

The lemma follows by adding up the multiplicative factors that we lose for level-1, level-2, and level-3 facilities.  $\square$

Finally, we bound the connection cost.

**Theorem 8.** *Let  $U$  be the set of clients and  $x_{uv}$  be the fractional solution for client  $u \in U$ . Then, the connection cost of integer solution for client  $u$  is at most  $8 \sum_{v \in V} d(u, v)x_{uv}$ .*

*Proof.* This follows directly from the fact that the algorithm is 4-consistent, via Lemma 1.  $\square$

Now we are ready to prove Theorem 2.

*Proof of Theorem 2.* The proof follow by combining Theorem 7 and Theorem 8.  $\square$

## 4 RANDOMIZED ROUNDING ALGORITHM FOR GENERAL OPENING COSTS

In this section, we describe a randomized rounding algorithm for the weighted online facility location problem with the following properties: (a) the rounding algorithm is  $\gamma$ -consistent for some constant  $\gamma$  (this property holds deterministically), and (b) at any time  $t$ , the *expected* facility opening cost of the integral solution is at most  $O(\log \log \Delta_t)$  times that of the fractional solution, where  $\Delta_t$  denotes the aspect ratio of the metric space at time  $t$ , i.e., the ratio of the maximum to the minimum (non-zero) distance between any pair of vertices. Formally,

**Theorem 9.** *There exists a randomized online algorithm that rounds a fractional solution for facility location online and the expected cost of the rounded integral solution is  $O((\log \log \Delta) \cdot \alpha)$ , where  $\alpha$  denotes the cost of the fractional solution.*

In defining the rounding algorithm, it will be convenient to assume that the fractional mass  $y_v$  at any vertex  $v$  does not change over time. This is without loss of generality by the following standard technique: whenever the fractional algorithm increases the fractional mass at a vertex  $v$  by some quantity  $\delta$ , we create a second copy of vertex  $v$ , namely a new vertex that is at distance 0 from  $v$  and at the same distance as  $v$  from all other vertices, and set the fractional mass on the new vertex to  $\delta$ . The facility opening cost of the new vertex is the same as that of the original vertex. Clearly, the opening and connection costs of the new fractional solution are identical to the original solution, but this new solution has the advantage that the fractional mass on a vertex is set in only one step. In the rest of this paper, we will assume that the fractional solution satisfies this property. We emphasize that this is not an additional assumption on the input; rather, it is a purely notational transformation that preserves all opening and connection costs and works for any metric space. Moreover, this transformation does not affect the running time of the algorithm beyond constant factors.

We describe the rounding algorithm next, and then give its analysis in Appendix B to establish properties (a) and (b) above.

#### 4.1 RANDOMIZED ROUNDING ALGORITHM

If any vertex  $v$  has  $y_v^t \geq 1/2$ , we immediately open a facility at that vertex. We call this a *deterministic* rounding step, and the corresponding facilities are called deterministic facilities. Clearly, the total opening cost of deterministic facilities is at most twice their fractional opening cost. In the rest of the description, we focus on how the algorithm opens the rest of the facilities using a randomized algorithm.

The algorithm uses a counter for every vertex  $v$  that we call its *level* and denote  $\ell(v)$ . In the following, we will say that a vertex has been rounded by the randomized algorithm if it has been involved in a randomized step of the algorithm. Initially,  $\ell(v) = 0$ . Over time,  $\ell(v)$  tracks the number of times vertex  $v$  has been rounded by the algorithm. Since the algorithm rounds vertices randomly, the level counters are random variables. Eventually, we will show that for every vertex  $v$ , the expected value of  $\ell(v)$  at time  $t$  is  $O(\log \log \Delta_t)$ . For notational convenience, we also maintain a level counter of value 1 at each deterministic facility. These counters do not change over time.

It will be convenient to maintain an order  $\prec$  on all the vertices in the metric space. The precise order is not important, but for consistency,  $v \prec v'$  if  $v$  appears earlier than  $v'$  in the online problem (ties are broken arbitrarily for vertices that appear in the same time-step). We also set up a lexicographic order on all balls  $B^t(v, R)$  in the metric space, which we also denote  $\prec$ , using the following rules: (a) if  $t < t'$ , then  $B^t(v, R) \prec B^{t'}(v', R')$  for any vertices  $v, v'$  and radii  $R, R'$ , (b) for any time  $t$ , if  $R < R'$ , then  $B^t(v, R) \prec B^t(v', R')$  for any vertices  $v, v'$ , and (c) for any time  $t$  and radius  $R$ , if  $v \prec v'$ , then  $B^t(v, R) \prec B^t(v', R)$ .

At any time  $t$ , we call a ball  $B^t(v, R)$  *critical* if it satisfies the following properties: (a) the total fractional mass in  $B^t(v, R)$  is at least  $1/2$ , and (b) there is no overlapping critical ball with radius at most  $2R$  that appears earlier in the lexicographic order, i.e., there is no  $B^{t'}(v', R') \prec B^t(v, R)$  with radius  $R' \leq 2R$  such that  $B^{t'}(v', R') \cap B^t(v, R) \neq \emptyset$ . Observe that critical balls are defined deterministically since this definition only depends on the fractional solution. We also define the level of a critical ball  $B := B^t(v, R)$  as  $\ell(B) := \min\{\ell : \sum_{u \in B: \ell(u) \leq \ell} y_u^t \geq 1/4\}$ . Note that although the fact that a ball is critical is deterministic, its level is random since it depends on the values of the level counters which themselves are random variables.

Finally, we define the randomized rounding step. At time  $t$ , we consider the critical balls in lexicographic order  $\prec$ . For a critical ball  $B := B^t(v, R)$ , if there is an open facility in  $B$  already, then we do nothing. Otherwise, we open a facility at a location in  $B_\ell := \{u \in B : \ell(u) \leq \ell(B)\}$  with probability proportional to  $y_u^t$ . (In other words, the probability of opening a facility at  $u \in B_\ell$  is  $y_u^t / \sum_{u \in B_\ell} y_u^t$ ). Correspondingly, we increase by one the level counters  $\ell(u)$  of all locations  $u \in B_\ell$ . This algorithm is already sufficient, but for the sake of simpler analysis, we add one more step. For each vertex  $u \in B_\ell$ , we also open a facility at  $u$  independently with probability  $y_u^t$ . We call the two randomized rounding steps respectively the *dependent* and *independent* rounding steps.

**Why a constant factor remains open in the non-uniform case.** We show in Appendix D that the analysis of our randomized algorithm is asymptotically tight. In particular, any improvement over the  $O(\log \log \Delta)$  bound would require fundamentally new ideas. At a high level, the key structural difference between the uniform and non-uniform settings lies in how facility opening costs can be charged to fractional mass. In the uniform case, the cost of opening a facility at a vertex can be charged to fractional mass in nearby regions of the metric space. This charging argument crucially exploits the uniformity of opening costs. In contrast, in the non-uniform case, the opening cost of a facility at a vertex cannot, in general, be charged to fractional mass located elsewhere in the metric space.

## 5 APPLICATION TO LEARNED-AUGMENTED FACILITY LOCATION

In this section we show how to leverage the presented online rounding algorithms to obtain algorithms for the learning-augmented facility location.

Our starting point is the online fractional algorithm for learning-augmented facility location presented in Anand et al. (2022) that gives the following theorem:

**Theorem 10** (Theorem 7.1 from Anand et al. (2022) restated). *There is an algorithm for the fractional online facility location problem that at time  $t$  produces an online solution with cost  $O(\min\{\log(k+1) \text{dynamic}_t, \frac{\log t}{\log \log t} \text{opt}_t\})$  in the multiple predictions setting with  $k$  predictions.*

We apply our rounding algorithms presented in Section 3 and Section 4 on the fractional solution constructed in Anand et al. (2022) to obtain integral algorithms for the learning-augmented facility location. In particular, we obtain the following theorems for the uniform (Theorem 11) and non-uniform (Theorem 12) setting. Note that the two theorems obtain consistency bounds of  $O(\log(k+1))$  and  $O(\log \log \Delta \cdot \log(k+1))$  respectively, while ensuring a robustness bound of  $O(\frac{\log t}{\log \log t})$ . (The proofs are deferred to Appendix C. Also recall that, by standard techniques (see Appendix E), the upper bound  $O(\log \log \Delta)$  may be replaced by  $O(\log \log n)$ .)

**Theorem 11.** *There is an algorithm for the uniform learning-augmented facility location problem that at time  $t$  produces an online solution with cost  $O(\min\{\log(k+1) \text{dynamic}_t, \frac{\log t}{\log \log t} \text{opt}_t\})$ .*

**Theorem 12.** *There is an algorithm for the non-uniform learning-augmented facility location problem that at time  $t$  produces an online solution with cost  $O(\min\{\log \log \Delta \cdot \log(k+1) \text{dynamic}_t, \frac{\log t}{\log \log t} \text{opt}_t\})$ .*

## CONCLUSIONS AND FUTURE WORK

We present two new algorithms to round online a fractional facility location solution and we show how to use them to obtain learning-augmented facility location algorithms. The algorithms obtains almost tight guarantees for the learning-augmented problem and are simple and natural. As follow-up questions, it would be interesting to find a rounding algorithm for the non-uniform settings that lose only a constant factor in the approximation. It would also be very nice to modify the fractional algorithm in Anand et al. (2022) to obtain a  $O(\min\{\frac{\log k}{\log \log k} \text{dynamic}_t, \frac{\log t}{\log \log t} \text{opt}_t\})$ -approximation or show that it is impossible.

## IMPACT STATEMENT

This paper presents work whose goal is to advance the field of Machine Learning. The main contribution of the paper is theoretical and is of interest to the domain of designing robust algorithms leveraging machine learning advice.

## ACKNOWLEDGMENT

This research project was initiated at Dagstuhl Seminar 23061 ‘‘Scheduling.’’ We thank the organizers and Dagstuhl for their support.

## REFERENCES

- Matteo Almanza, Flavio Chierichetti, Silvio Lattanzi, Alessandro Panconesi, and Giuseppe Re. Online facility location with multiple advice. *Advances in neural information processing systems*, 34:4661–4673, 2021.
- Noga Alon, Baruch Awerbuch, Yossi Azar, Niv Buchbinder, and Joseph Naor. A general approach to online network optimization problems. *ACM Transactions on Algorithms (TALG)*, 2(4):640–660, 2006.
- Aris Anagnostopoulos, Russell Bent, Eli Upfal, and Pascal Van Hentenryck. A simple and deterministic competitive algorithm for online facility location. *Information and Computation*, 194(2): 175–202, 2004.
- Keerti Anand, Rong Ge, Amit Kumar, and Debmalya Panigrahi. Online algorithms with multiple predictions. In *International Conference on Machine Learning*, pages 582–598. PMLR, 2022.
- Antonios Antoniadis, Themis Gouleakis, Pieter Kleer, and Pavel Kolev. Secretary and online matching problems with machine learned advice. *Advances in Neural Information Processing Systems*, 33: 7933–7944, 2020.
- Yossi Azar, Debmalya Panigrahi, and Noam Touitou. Online graph algorithms with predictions. In *Proceedings of the 2022 Annual ACM-SIAM Symposium on Discrete Algorithms (SODA)*, pages 35–66. SIAM, 2022.
- Xingjian Bai and Christian Coester. Sorting with predictions. *Advances in Neural Information Processing Systems*, 36:26563–26584, 2023.
- Eric Balkanski, Vasilis Gkatzelis, and Golnoosh Shahkarami. Randomized strategic facility location with predictions. *Advances in Neural Information Processing Systems*, 37:35639–35664, 2024.
- Etienne Bamas, Andreas Maggiori, and Ola Svensson. The primal-dual method for learning augmented algorithms. *Advances in Neural Information Processing Systems*, 33:20083–20094, 2020.
- Marcin Bienkowski, Björn Feldkord, and Paweł Schmidt. A nearly optimal deterministic online algorithm for non-metric facility location. *arXiv preprint arXiv:2007.07025*, 2020.
- Niv Buchbinder, Joseph Naor, and David Wajc. Lossless online rounding for online bipartite matching (despite its impossibility). In *Proceedings of the 2023 Annual ACM-SIAM Symposium on Discrete Algorithms (SODA)*, pages 2030–2068. SIAM, 2023.
- Justin Chen, Sandeep Silwal, Ali Vakilian, and Fred Zhang. Faster fundamental graph algorithms via learned predictions. In *International Conference on Machine Learning*, pages 3583–3602. PMLR, 2022.
- Vincent Cohen-Addad, Benjamin Guedj, Varun Kanade, and Guy Rom. Online k-means clustering. In *International Conference on Artificial Intelligence and Statistics*, pages 1126–1134. PMLR, 2021.
- Vincent Cohen-Addad, Silvio Lattanzi, Andreas Maggiori, and Nikos Parotsidis. Online and consistent correlation clustering. In *International Conference on Machine Learning*, pages 4157–4179. PMLR, 2022.
- Dimitris Fotakis. A primal-dual algorithm for online non-uniform facility location. *Journal of Discrete Algorithms*, 5(1):141–148, 2007.
- Dimitris Fotakis. On the competitive ratio for online facility location. *Algorithmica*, 50(1):1–57, 2008.
- Dimitris Fotakis. Online and incremental algorithms for facility location. *ACM SIGACT News*, 42(1): 97–131, 2011.
- Dimitris Fotakis, Evangelia Gergatsouli, Themis Gouleakis, and Nikolas Patrís. Learning augmented online facility location. *CoRR*, abs/2107.08277, 2021a. URL <https://arxiv.org/abs/2107.08277>.

- Dimitris Fotakis, Loukas Kavouras, and Lydia Zakyntinou. Online facility location in evolving metrics. *Algorithms*, 14(3):73, 2021b.
- Dimitris Fotakis, Evangelia Gergatsouli, Themistoklis Gouleakis, Nikolas Patris, and Thanos Tolias. Improved bounds for online facility location with predictions. In *Proceedings of the AAAI Conference on Artificial Intelligence*, volume 39, pages 26973–26981, 2025.
- Sungjin Im, Ravi Kumar, Mahshid Montazer Qaem, and Manish Purohit. Online knapsack with frequency predictions. *Advances in neural information processing systems*, 34:2733–2743, 2021.
- Shaofeng H.-C. Jiang, Erzhi Liu, You Lyu, Zhihao Gavin Tang, and Yubo Zhang. Online facility location with predictions. In *The Tenth International Conference on Learning Representations, ICLR 2022, Virtual Event, April 25-29, 2022*. OpenReview.net, 2022. URL <https://openreview.net/forum?id=DSQHjibtgKR>.
- Silvio Lattanzi and Sergei Vassilvitskii. Consistent k-clustering. In *International Conference on Machine Learning*, pages 1975–1984. PMLR, 2017.
- Silvio Lattanzi, Thomas Lavastida, Benjamin Moseley, and Sergei Vassilvitskii. Online scheduling via learned weights. In *Proceedings of the Fourteenth Annual ACM-SIAM Symposium on Discrete Algorithms*, pages 1859–1877. SIAM, 2020.
- Silvio Lattanzi, Benjamin Moseley, Sergei Vassilvitskii, Yuyan Wang, and Rudy Zhou. Robust online correlation clustering. *Advances in Neural Information Processing Systems*, 34:4688–4698, 2021.
- Thodoris Lykouris and Sergei Vassilvitskii. Competitive caching with machine learned advice. *Journal of the ACM (JACM)*, 68(4):1–25, 2021.
- Adam Meyerson. Online facility location. In *Proceedings 42nd IEEE Symposium on Foundations of Computer Science*, pages 426–431. IEEE, 2001.
- Michael Mitzenmacher and Sergei Vassilvitskii. Algorithms with predictions. *Communications of the ACM*, 65(7):33–35, 2022.
- Joseph Naor, Aravind Srinivasan, and David Wajc. Online dependent rounding schemes for bipartite matchings, with. In *Proceedings of the 2025 Annual ACM-SIAM Symposium on Discrete Algorithms (SODA)*, pages 3116–3154. SIAM, 2025.
- Manish Purohit, Zoya Svitkina, and Ravi Kumar. Improving online algorithms via ml predictions. *Advances in Neural Information Processing Systems*, 31, 2018.
- Alexander Wei and Fred Zhang. Optimal robustness-consistency trade-offs for learning-augmented online algorithms. *Advances in Neural Information Processing Systems*, 33:8042–8053, 2020.

## A PROOF OF LEMMA 6

**Lemma 6.** *Consider a level-2 facility opened by a ball  $B(u, r)$  at time  $t$ . Let the predecessor of this level-2 facility at  $u$  be a level-2 facility at  $u'$  that was opened by the level-2 ball  $B(u', r')$  at time  $t' \leq t$ . Then,*

$$y^t(B(u, r)) - y^{t'}(B(u, r)) \geq 1/8.$$

*Proof.* Since the balls  $B(u, r)$  and  $B(u', r')$  overlap, we have  $d(u, u') \leq r + r'$ . But, note that the ball  $B(u, r)$  satisfied condition B at time  $t$ , i.e., there was no open facility within a distance of  $3r$  of  $u$  at time  $t$ . In particular, this implies that the facility at  $u'$  is also at a distance  $> 3r$  from  $u$ , namely  $d(u, u') > 3r$ . It follows that  $r + r' > 3r$ , i.e.,  $r' > 2r$ .

Suppose the lemma is false, i.e.,  $y^t(B(u, r)) - y^{t'}(B(u, r)) < 1/8$ . Since  $y^t(B(u, r)) \geq 1/4$ , it follows that  $y^{t'}(B(u, r)) > 1/8$ . Since the processing of  $B(u', r')$  did not open a facility at  $u$ , it must be that  $B(u, r)$  failed condition C at the end of this processing. Since  $y^{t'}(B(u, r)) > 1/8$ , the only way this can happen is if there was a facility open at distance  $\leq 2r$  from  $u$  at the end of the processing for  $B(u', r')$ . But, this contradicts the fact that  $B(u, r)$  satisfied condition B at time  $t$ .  $\square$

## B ANALYSIS OF THE RANDOMIZED ROUNDING ALGORITHM

The  $\gamma$ -consistency property follows immediately from the definition of the algorithm.

**Lemma 14.** *The randomized rounding algorithm given above is 5-consistent.*

*Proof.* Let  $B := B^t(v, R)$  be such that  $y^t(B) \geq 1/2$ . If  $B$  is critical, then it contains an open facility after its rounding step. So, suppose  $B$  is not critical. Then, there must be some critical ball  $B' \prec B$  of radius at most  $2R$  overlapping with  $B$ ; call this ball  $B' := B(v', R')$ . Since the balls overlap and  $R' \leq 2R$ , we have  $B' \subseteq B(v, 5R)$  by triangle inequality. After the rounding step for  $B'$ , there must be an open facility in  $B'$ , which is at a distance of at most  $5R$  from  $v$ . This establishes the lemma.  $\square$

We now bound the expected facility opening cost incurred by the rounding algorithm. Note that the level of a vertex  $\ell(v)$  denotes the number of times it has been rounded.

**Lemma 15.** *Fix any vertex  $v$  and let  $y_v$  be the value of  $y_v^t$  at the end of the algorithm. If  $\ell(v)$  denotes the number of times that vertex  $v$  is rounded in the entire algorithm, then the expected facility cost at  $v$  is at most  $5c(v)y_v \cdot \mathbb{E}[\ell(v)]$ .*

*Proof.* First, note that if there is a deterministic facility at  $v$ , then the lemma holds for  $v$  since the cost of the facility is  $c(v)$ , the level of the vertex  $\ell(v) = 1$ , and the fractional value  $y_v \geq 1/2$ . In the rest of the proof, we assume that  $y_v < 1/2$ , i.e., there is no deterministic facility at  $v$ . Next, note that  $y_v^t = y_v$  at all times  $t$  when  $v$  is rounded, since  $y_v$  is set in only one step of the fractional algorithm and  $v$  is rounded only after  $y_v^t > 0$ . Moreover, the cumulative fractional mass of all vertices in  $B_\ell$  for randomized rounding of a ball  $B$  is at least  $1/4$ . I.e., the probability that a facility is opened at  $v$  in a single dependent rounding step is at most  $4y_v$ . Including the independent rounding step, the total probability of opening a facility at  $v$  is at most  $5y_v$ .

Consider the random variables  $Y_i(v)$  with value  $c(v)$  if a facility is opened at vertex  $v$  when  $\ell(v) = i$ , and 0 otherwise. These random variables are independent across different values of  $i$ , and their expected value is bounded by  $\mathbb{E}[Y_i(v)] \leq 5c(v)y_v$  for every  $i$ . The number of such random variables is given by the final value of  $\ell(v)$ , which is determined by a stopping rule. Using Wald's identity, we then have that the expected facility cost at  $v$  is at most  $5c(v)y_v \cdot \mathbb{E}[\ell(v)]$ .  $\square$

By the above lemma, it suffices to bound the value  $\mathbb{E}[\ell(v)]$  for any vertex  $v$ . Indeed, we will show that  $\mathbb{E}[\ell(v)] \leq O(\log \log \Delta)$ . But first, we establish a simpler deterministic bound on  $\ell(v)$ .

**Lemma 16.** *Any vertex  $v$  belongs to at most  $1 + \lg \Delta$  critical balls. Therefore,  $\ell(v) \leq 1 + \lg \Delta$ .*

*Proof.* Clearly, the lemma holds if there is a deterministic facility at  $v$ , since  $\ell(v) = 1$ . Hence, we assume  $y_v < 1/2$  in the rest of the proof. Suppose  $v$  is in two critical balls  $B := B^t(u, R)$  and  $B' := B^{t'}(u', R')$ , where wlog,  $t \leq t'$ . Since these balls overlap, it must be that  $R > 2R'$  by the definition of critical balls. Now, since  $y_v < 1/2$ , the minimum radius of any critical ball containing  $v$  must be 1. The maximum radius of any ball in the metric space is  $\Delta$ . The lemma follows.  $\square$

Next, we bound the expected level of a vertex. We do this in two steps. In the first step, we give a tail bound on the level of a critical ball that the algorithm performs randomized rounding on.

**Lemma 17.** *For any critical ball  $B$ , the probability that the algorithm performs the randomized rounding step for  $B$  at level  $\ell(B) > \ell$  for any positive integer  $\ell$  is at most  $e^{-\ell/4}$ .*

*Proof.* If the algorithm performs randomized rounding for  $B$ , then it must be that all previous rounding attempts for vertices in  $B$  did not open any facility. In particular, this is true for the independent rounding attempts on these vertices. Each independent rounding attempt for a vertex  $v$  with fractional value  $y_v$  fails with probability  $1 - y_v \leq e^{-y_v}$ . Since these rounding attempts are independent, the probability that all these attempts fail to open any facility is at most  $e^{-\sum_{v \in B} y_v \cdot \ell(v)}$ . Since  $\ell(B) \geq \ell$  and  $\sum_{v \in B} y_v \geq 1/2$  (the latter because  $B$  is critical), we get  $e^{-\sum_{v \in B} y_v \cdot \ell(v)} \leq e^{-\ell/4}$ .  $\square$

We now use this lemma to bound the expected level of any vertex.

**Lemma 18.** *The expected level of any vertex at the end of the algorithm is at most  $1 + 8 \ln(1 + \lg \Delta) = O(\log \log \Delta)$ .*

*Proof.* Fix any vertex  $v$ . By Lemma 16, it belongs to at most  $1 + \lg \Delta$  critical balls; call them  $B_1, B_2, \dots, B_k$  where  $k \leq 1 + \lg \Delta$ . For each such ball  $B_i$ , by Lemma 17, randomized rounding is performed for ball  $B_i$  at a level  $> 8 \ln(1 + \lg \Delta)$  with probability at most  $e^{-2 \ln(1 + \lg \Delta)} = 1/(1 + \lg \Delta)^2$ . Using the union bound over the  $k \leq 1 + \lg \Delta$  balls, the probability that randomized rounding is performed for any ball containing  $v$  at a level  $> 8 \ln(1 + \lg \Delta)$  is at most  $1/(1 + \lg \Delta)$ . Since the maximum value of  $\ell(v)$  is (deterministically)  $1 + \lg \Delta$  by Lemma 16, it follows that the expected value of  $\ell(v)$  is at most  $1 + 8 \ln(1 + \lg \Delta) = O(\log \log \Delta)$ .  $\square$

Now, we can prove our main Theorem 9 for the section.

*Proof of Theorem 9.* From Lemma 14 we know that our algorithm is 5 consistent and so we have a bound on the connection cost (Lemma 1). To bound the facility cost we note that Lemma 15 implies that the bound on the facility cost is directly implied by a bound on the expected level of any vertex at the end of the algorithm. That is bounded in expectation by  $O(\log \log \Delta)$  by Lemma 18.  $\square$

**Dependence on the aspect ratio.** We emphasize that the above bound holds for arbitrary metric spaces. In particular, even if the aspect ratio  $\Delta_t$  changes over time, the competitive ratio does not degrade. Furthermore, using the reduction in Section E, the dependence on  $\Delta$  can be replaced by a dependence on  $n$ .

## C PROOF OF THEOREM 11 AND THEOREM 12

**Theorem 11.** *There is an algorithm for the uniform learning-augmented facility location problem that at time  $t$  produces an online solution with cost  $O(\min\{\log(k + 1) \text{dynamic}_t, \frac{\log t}{\log \log t} \text{opt}_t\})$ .*

*Proof.* The result is obtained by running the rounding algorithm presented in Section 3 on the fractional solution returned by the algorithm in Anand et al. (2022). Then, the result follows by combining Theorem 10 with Theorem 2.  $\square$

**Theorem 12.** *There is an algorithm for the non-uniform learning-augmented facility location problem that at time  $t$  produces an online solution with cost  $O(\min\{\log \log \Delta \cdot \log(k + 1) \text{dynamic}_t, \frac{\log t}{\log \log t} \text{opt}_t\})$ .*

*Proof.* We run the rounding algorithm presented in Section 4 on the fractional solution returned by the algorithm in Anand et al. (2022). Then, combining Theorem 10 with Theorem 9 gives a bound of  $O(\log \log \Delta \cdot \min\{\log(k+1) \text{ dynamic}_t, \frac{\log t}{\log \log t} \text{opt}_t\})$ .

We now improve the robustness bound from  $O(\log \log \Delta \cdot \frac{\log t}{\log \log t} \text{opt}_t)$  to  $O(\frac{\log t}{\log \log t} \text{opt}_t)$ . To do this, we use a standard technique of a combiner algorithm whose solution matches, up to a constant factor, the better of the rounded solution and that of an online algorithm without predictions. In our case, the latter algorithm is the  $O(\frac{\log t}{\log \log t})$ -competitive online facility location algorithm in Fotakis (2008).

We now give more details of how the two algorithms are combined to yield a robust algorithm. At any time  $t$ , compare the cost of the solutions (including both opening costs of facilities and connection costs of clients) of the two algorithms. For the algorithm that has the smaller cost, we open all facilities opened by that algorithm. So, clients can connect to their closest facilities given by this algorithm, and therefore, the total cost of opening these facilities and connecting clients is at most the total cost of the cheaper algorithm at time  $t$ .

For the other algorithm, we might have some facilities that are already open in the combiner algorithm from previous steps – we keep those facilities open but do not open any more facilities. Suppose  $t' < t$  was the last time when the second algorithm was cheaper. Then, the open facilities in the combiner algorithm due to the second algorithm were already open in the second algorithm at time  $t'$  (since the combiner algorithm does not open any new facilities from the more expensive algorithm). Now, note that the costs of the two algorithms are monotonically non-decreasing since the set of clients is monotonically increasing. Thus means the cost of the cheaper of the two algorithms is also monotonically non-decreasing. Thus, the cost of the cheaper algorithm at time  $t$  is at least as much as the cost of the other algorithm at time  $t'$  when it was the cheaper of the two algorithms. Hence, the total opening cost of the facilities in the second algorithm at time  $t'$  is at most the current cost of the first algorithm at time  $t$ . It follows that the total cost of the combiner algorithm at any time  $t$  is at most 2 times the cost of the cheaper of the two algorithms at time  $t$ . Since the algorithm without predictions has a competitive ratio of  $O(\frac{\log t}{\log \log t})$ , we get a robustness bound of  $O(\frac{\log t}{\log \log t})$  using the combiner algorithm.  $\square$

## D LOWER BOUND ON APPROXIMATION GUARANTEE OF RANDOMIZED ALGORITHM

We show that the analysis of the randomized algorithm is asymptotically tight.

**Theorem 19.** *There is an instance for which the expected cost of the solution returned by the randomized algorithm is  $\Omega(\log \log \Delta)$  times the cost of the fractional solution.*

The lower bound will consist of  $10^d$  batches. The high-level intuition is that each batch will increase the level of (i.e., try to round) a special facility  $u$  with probability at least  $1/5^d$ . This will allow us to prove that the randomized algorithm opens facility  $u$  with a probability that is at least  $d$  times the fractional opening value of  $u$  given by the linear program. Then setting the opening cost of this facility so that it completely dominates the objective function will allow us to prove our lower bound of  $\Omega(\log \log \Delta)$  because  $d = \Omega(\log \log \Delta)$  in our construction. We remark that, as the randomized algorithm is oblivious to the points of the instance, we only describe in the construction how the fractional openings changes in the fractional solution that is rounded and omit the clients (that are irrelevant for the behavior of the randomized algorithm).

The metric is defined by the real line  $\mathbb{R}$ , and the distinguished vertex  $u$  is positioned at the origin. The fractional value of  $u$  is set to  $\varepsilon > 0$ , i.e.,  $y_u = \varepsilon$ , deliberately chosen to be a tiny value. The cost of the special facility is  $c(u) = M/\varepsilon$  and the cost of all other facilities is 0. We select  $M \gg 10^{10^{2d}}$  sufficiently large so that the cost of the linear program solution is always dominated by  $c(u) \cdot y_u = M$ , i.e., the total connection cost is  $o(M)$  (recall that the remaining opening cost is 0).

We now proceed with the description of the instance that yields the lower bound (see also Figure 2). For  $b = 1, \dots, 10^d$ , the  $b$ th batch of arrivals is defined by the scale parameter  $\gamma(b) = 10^{10^d(10^d - b)}$  and  $d + 2$  facility locations that arrive during  $d + 2$  time steps:

- First, center  $c$  arrives at position  $\gamma(b)$  with  $y_c = 1/2 - 2\varepsilon$ .
- During the next  $d$  time steps, centers  $v_1, v_2, \dots, v_d$  arrive. Center  $v_i$  is at position  $\gamma(b)10^{d+1-i}$  and has  $y_{v_i} = 1/5$ .
- Finally, an extra center  $c'$  collocated with  $c$  arrives with  $y_{c'} = \varepsilon$ .

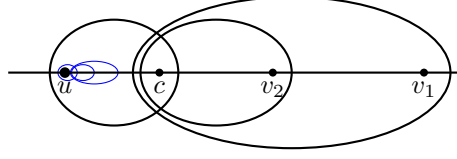

Figure 2: An illustration of the construction with  $d = 2$ . The ellipsoids depicted in black correspond to one batch and the blue correspond to the following batch. Due to the scaling factor  $\gamma(\cdot)$  the different batches do not interact and by the geometrically decreasing radii of balls inside a batch we have that the critical balls of a batch are in order  $(c, v_1), (c, v_2), \dots, (c, v_d), (c, c', u)$  (the drawing is in logarithmic scale). The center  $c'$  arriving last of a batch is collocated with  $c$  and is not depicted.

By definition, the maximum distance in our construction is upper bounded by  $\gamma(1) \cdot 10^d = \gamma(b) = 10^{10^d(10^d-b)}$ .  $10^d \leq 10^{10^{2d}}$  and the smallest distance is at least 1. Hence, by construction

$$\Delta \leq 10^{10^{2d}} \quad \text{and} \quad \log \log \Delta = O(d).$$

We now discuss the critical balls that are formed in our construction, which also gives valuable intuition for the construction. First, for a single batch, the critical balls that are formed (only using centers from that batch and  $u$ ) are in order

$$(c, v_1), (c, v_2), \dots, (c, v_d) \text{ and finally } (c, c', u).$$

(Here, we identify the balls with the locations that they contain for notational simplicity.) This is because the placement of the centers  $c$  and  $c'$  to be at position  $\gamma(b)$  for batch  $b$  and  $v_i$  to be at position  $\gamma(b) \cdot 10^{d+1-i}$  ensures that the radii of the above balls are rapidly decreasing. Specifically, when  $v_i$  arrives, any ball  $B$  containing centers from this batch with  $y(B) \geq 1/2$  must either contain  $c$  and  $v_i$  or  $v_i$  and  $v_j$  with  $j < i$ . By their placement, the radii of the ball  $(c, v_i)$  is significantly smaller than any ball containing  $v_i$  and  $v_j$ . Additionally, it is significantly smaller than the previous critical balls which makes it critical. Finally, when  $c'$  arrives, we have the critical ball of radii  $\gamma(b)$  that contains  $(c, c', u)$  (which now thanks to the arrival of  $c'$  has  $y$ -value  $1/2$ ). Repeating the same arguments (using that  $\gamma(b+1) \ll \gamma(b)$ ), we can also conclude that there is no critical ball that contains two centers from two different batches.

We now proceed to analyze the random decisions of the algorithm. For simplicity and without loss of generality, we perform the analysis for  $d \geq 10$ . We say that a batch is *successful*, if the algorithm opens facilities  $v_1, \dots, v_d$  when considering critical balls  $(c, v_1), \dots, (c, v_d)$ , i.e., it does *not* open center  $c$ .

**Lemma 20.** *There are at least  $d$  successful batches with probability at least  $1/2$ .*

*Proof.* Let  $p$  be the probability that a batch is successful. We first prove that  $p \geq (1/5)^d$ . When  $v_1$  arrives, no center has been opened in the ball containing  $(c, v_1)$  due to the batch scale factor  $\gamma(\cdot)$ . The algorithm opens  $v_1$  with probability  $y_{v_1}/(y_{v_1} + y_c) \geq y_{v_1} = 1/5$ . Now, assuming the algorithm opens  $v_1$ , the same arguments say that the algorithm opens  $v_2$  with probability at least  $1/5$ . That  $p \geq (1/5)^d$  then follows by repeating the argument for  $v_3, \dots, v_d$ .

The total number of batches are  $10^d$  and so the expected number of successful batches are  $10^d/5^d = 2^d$ . The statement now follows via a standard Chernoff bound using that the success of different batches are independent events. For simplicity and completeness, we include a direct argument. The probability that exactly  $\ell$  batches are successful is

$$\binom{10^d}{\ell} p^\ell (1-p)^{10^d-\ell} \leq \binom{10^d}{\ell} (1 - (1/5)^d)^{10^d}.$$

We have that  $\sum_{\ell=0}^d \binom{10^d}{\ell} \leq (d+1)\binom{10^d}{\ell} \leq (d+1)10^{d^2}$ . At the same time  $(1 - (1/5)^d)^{10^d} \leq 1/e^{10^d/5^d} = 1/e^{2^d}$ . The statement now follows since  $(d+1) \cdot 10^{d^2}/e^{2^d} \leq 1/2$  where we use that  $d \geq 10$ .  $\square$

Now consider the case when there are at least  $d$  batches that are successful. Consider the  $d$  first such successful batches and let  $E_i$  be the event that the randomized algorithm opens center  $u$  when considering the  $i$ th of these batches.

**Lemma 21.** *We have  $\Pr[E_1 \vee E_2 \vee \dots \vee E_d] = 2d \cdot \varepsilon$ .*

*Proof.* We have

$$\Pr[E_1 \vee E_2 \vee \dots \vee E_d] = \sum_{i=1}^d \Pr[E_i \mid \neg E_1, \dots, \neg E_{i-1}]$$

The lemma follows by arguing  $\Pr[E_i \mid \neg E_1, \dots, \neg E_{i-1}] = 2\varepsilon$ . As the batch corresponding to event  $E_i$  is successful, the facility  $c$  is at level  $d$  after the critical balls  $(c, v_1), \dots, (c, v_d)$ . Therefore as  $u$  has been considered  $i-1 < d$  times at this point, i.e. is at level less than  $d$ , we have that the level of the ball  $(u, c, c')$  is at most  $d$ . Therefore, the probability that  $u$  is opened by the randomized algorithm equals  $y_u/(y_u + y_c + y_{c'}) = 2y_u = 2\varepsilon$ . Having proved that  $\Pr[E_i \mid \neg E_1, \dots, \neg E_{i-1}] = 2\varepsilon$ , the lemma follows by the sum.  $\square$

We have that there are  $d$  successful batches with probability at least  $1/2$ . If that holds, the probability that the randomized algorithm opens  $u$ , which incurs a cost of  $M/\varepsilon$ , is at least  $2d\varepsilon$ . It follows that the expected cost of the randomized algorithm is at least  $d \cdot M$ , which as noted above is  $\Omega(\log \log \Delta)$  times the cost of the fractional LP solution. This completes the proof of Theorem 19.

## E REDUCTION FROM $O(\log \log \Delta)$ TO $O(\log \log n)$

Recall that we have shown that the expected cost of the randomized algorithm is  $O(\log \log \Delta)$  times that of the fractional solution. We now show that a slight modification of the algorithm changes the expected cost to  $O(\log \log n)$  times the fractional cost, which might be more desirable if the number of vertices is small compared to the aspect ratio of the metric space.

By scaling, let us assume that the minimum distance between two non-identical vertices in the metric space is at least 1 and at most  $\Delta$ . (Note that for notational convenience, we created copies of identical vertices if multiple clients appear at the same vertex over time. However, this was simply a notational change, i.e., the competitive ratio of the algorithm is not affected if we switch back to a notation where distinct vertices are not co-located but the number of clients at a vertex can increase over time. We will take this latter view in this reduction.)

We first describe the reduction in the offline case, and then adapt it to the online setting. Our basic idea is to merge pairs of vertices that are within a distance of  $\text{opt}/n^2$ , where  $\text{opt}$  is the cost of the fractional solution and  $n$  is the total number of clients. To merge of a pair of vertices, consider a complete graph on all the vertices where the length of every edge is their pairwise distance. Now, change the length of the edge connecting the two vertices being merged to 0 and recompute all pairwise distances in the metric space as the shortest path distances in the modified graph. Then, unify the two merged vertices into a single vertex whose opening cost is the smaller among the two merged vertices. We repeatedly perform this step of merging vertex pairs at a mutual distance of  $\text{opt}/n^2$  or less unless no such pair is left. (The precise order of the mergers is unimportant.) Note that as a result of these mergers, the following happen:

- The minimum distance between any pair of vertices in the modified metric space is  $\geq \text{opt}/n^2$ .
- The difference in the distances between any pair of vertices in the original and modified metric spaces (in the modified metric space, each vertex represents multiple merged vertices of the original metric space) is at most  $\text{opt}/n$ . This is because any path in the original metric space constitutes at most  $|V| - 1$  merged pairs, where  $|V| \leq n$  since each vertex has at least one client (we assume wlog that every vertex has at least one client). Therefore, the additional connection cost paid by a client in the original metric space compared to the modified one is  $\leq \text{opt}/n$ , which adds up to  $\leq \text{opt}$  over all the  $n$  clients.

Next, we decrease the maximum distance between any vertex pair. We define an unweighted graph on the vertices where each vertex pair that is at a distance of  $\leq 2\text{opt}$  is connected by an edge. Then, we identify the connected components of this auxiliary graph, and create a separate metric space for each connected component. This results in the following:

- The maximum distance between any pair of vertices in any of the individual metric spaces is  $\leq 2(|V| - 1) \cdot \text{opt} \leq 2n \cdot \text{opt}$ .
- For any client, the fractional solution connects at least half of the client within its component since connections across different components cost  $> 2\text{opt}$ . Hence, it suffices for the algorithm to operate independently on each metric space by incurring a constant factor overhead in cost compared to the fractional solution.

Overall, these two steps ensure that the aspect ratio of the metric space on which the algorithm operates is at most  $\text{poly}(n)$ , which in turn establishes an expected cost of  $O(\log \log n)$  times the fractional cost for the randomized algorithm.

The above discussion only holds for an offline transformation to reduce  $O(\log \log \Delta)$  to  $O(\log \log n)$ . In the online case, the first complication is that the value of  $\text{opt}$  is not known in advance and increases over time. We define a series of epochs, where an epoch ends when the value of  $\text{opt}$  doubles with respect to that at the beginning of the epoch. Suppose  $\text{opt}_t$  is the value of  $\text{opt}$  at time  $t$  when an epoch starts. Then, we perform the transformations given above with  $\text{opt} = 2\text{opt}_t$  so that  $\text{opt}$  remains an upper bound on the actual fractional cost throughout the epoch. Moreover,  $\text{opt}$  doubles in consecutive epochs thereby ensuring that the sum of  $\text{opt}$  across all the epochs is at most the final fractional cost times a constant factor.

In the rest of the discussion, we describe the reduction within a single epoch. The complication is that the number of clients  $n$  also changes over time, which affects the parameters of the transformation. To handle this, we partition an epoch into a series of phases. A phase that starts when the number of clients is  $n_t$  ends when the number of clients increases to  $n_t^2$ . (If the containing epoch ends before the end of a phase, then we start a new epoch and a new phase within that epoch.) Throughout the phase, we use  $n = n_t^2$  in the above transformation, which ensures that  $n$  is an upper bound on the actual number of clients. The expected cost in a phase is the fractional cost times  $O(\log \log n) = O(\log \log n_t)$ . Summing over all the phases in an epoch, we get  $O(\log \log n)$  times the fractional cost at the end of the epoch, where  $n$  is the number of clients in the epoch.

This completes the description of the overall reduction.

## F RUNNING TIME ANALYSIS

Let  $n$  be the number of vertices (clients and potential facilities) revealed up to time  $t$ . In a general metric space, we only have access to a pairwise distance matrix. The meaningful radii for any ball centered at a vertex are exactly the distances to the other  $n - 1$  vertices. Therefore, at any time  $t$ , there are  $O(n^2)$  distinct balls to track.

### F.1 DETERMINISTIC ROUNDING ALGORITHM (UNIFORM COSTS)

The computational bottleneck for the algorithm is finding the minimum radius balls that satisfy the required conditions.

Evaluating Condition A: The algorithm must find a ball  $B(v, R)$  of minimum radius where the total fractional mass is at least  $1/2$ , and the closest open facility is at a distance  $\geq 4R$ .

Evaluating Conditions B and C: It then recursively searches for overlapping balls  $B(u, r)$  and  $B(w, \rho)$  with minimum radii satisfying specific mass and distance thresholds.

Naively, checking the fractional mass and the distance to the nearest open facility for all  $O(n^2)$  possible balls takes  $O(n)$  time per ball, leading to an  $O(n^3)$  update time per step. However, if by maintaining a sorted arrays of distances from each vertex and by using a prefix sums for the fractional masses, we can update and evaluate the valid balls for a single center in  $O(n)$  time.

This reduces a global scan to  $O(n^2)$  time (after preprocessing), and yields a polynomial-time implementation overall.

## F.2 RANDOMIZED ROUNDING ALGORITHM (NON-UNIFORM COSTS)

The algorithm is computationally heavier because it requires global sorting and sequential overlap checking.

**Lexicographic Sorting:** The algorithm enforces a strict lexicographic order on all balls  $B(v, R)$  based on arrival time, radius, and vertex id. Maintaining the sorted order of  $O(n^2)$  balls takes  $O(n^2 \log n)$  time.

**Identifying Critical Balls:** A ball is deemed "critical" if its mass is  $\geq 1/2$  and it does not overlap with any previously ordered critical ball of radius  $\leq 2R$ . To determine this, the algorithm must iterate through the  $O(n^2)$  sorted balls. Overlap checking can be implemented in  $O(n)$  time per ball by maintaining, for each vertex  $u$ , the minimum radius of any previously-declared critical ball containing  $u$ ; then  $B(v, R)$  overlaps such a ball iff it contains some  $u$  with stored value  $\leq 2R$ . This yields an  $O(n^3)$  worst-case bound per online step for identifying critical balls.

**Level Calculation and Rounding:** Calculating the dynamic level  $\ell(B)$  for a critical ball requires summing masses based on individual vertex levels. Executing the dependent and independent probability flips for vertices within the ball takes  $O(n)$  time per critical ball.

Overall, the overlap-checking bottleneck brings the worst-case runtime to  $O(n^3)$  per online time step.
